# Supplementary material for: Efficacy of Phrenic Nerve Block and Suprascapular Nerve Block in Amelioration of Ipsilateral Shoulder Pain after Thoracic Surgery: A Systematic Review and Network Meta-Analysis
Source: Medicina (Kaunas). 2023 Jan 31;59(2):275. doi: 10.3390/medicina59020275 (PMC9962566; doi:10.3390/medicina59020275)
Supplement: Supplementary file 1 [file medicina-59-00275-s001.zip › medicina-2080285-supplementary.pdf]

**Table S1.** Search term details

| Search Term                                                                                                             | Database         | Literature search |                 | Search update |                   |
|-------------------------------------------------------------------------------------------------------------------------|------------------|-------------------|-----------------|---------------|-------------------|
|                                                                                                                         |                  | Citations         | Date            | Citations     | Date              |
| ((ipsilateral) AND (shoulder pain)) AND (thorac*)) AND (surgery)                                                        | PubMed           | 62                | 9 November 2020 | 69            | 30 September 2022 |
| TITLE-ABS ("shoulder pain" AND surgery AND (thoracic OR thoracotomy OR thoracoscopy)) AND ( LIMIT-TO ( DOCTYPE , "ar")) | Scopus           | 67                | 9 November 2020 | 75            | 30 September 2022 |
| (ipsilateral and "shoulder pain" and thorac* and surgery).af.                                                           | Ovid database    | 33                | 9 November 2020 | 40            | 30 September 2022 |
| ipsilateral AND shoulder pain AND thorac* AND surgery                                                                   | Cochrane Library | 34                | 9 November 2020 | 36            | 30 September 2022 |
| ALL FIELDS: (ipsilateral) AND ALL FIELDS: (shoulder pain) AND ALL FIELDS: (thorac*) AND ALL FIELDS: (surgery)           | Web of science   | 50                | 9 November 2020 | 50            | 30 September 2022 |
| ipsilateral AND 'shoulder pain' AND thorac* AND surgery                                                                 | EMBASE           | 56                | 9 November 2020 | 70            | 30 September 2022 |
| allintitle: "shoulder pain" thoracotomy OR thoracoscopy                                                                 | Google Scholar   | 37                | 9 November 2020 | 41            | 30 September 2022 |

**Table S2.** Description of intervention and co-intervention of included studies

| ID | Authors                           | Intervention | Types and volume of local anesthetics |                                  | Co-interventions                                                          |                                                           |                                                                             | Follow up period |
|----|-----------------------------------|--------------|---------------------------------------|----------------------------------|---------------------------------------------------------------------------|-----------------------------------------------------------|-----------------------------------------------------------------------------|------------------|
|    |                                   |              | Type                                  | Volume                           | TEA/TPVB                                                                  | Rescue medication for ISP                                 | Positioning                                                                 |                  |
| 1  | Scawn et al. (2001)               | PNB VS PLA   | 1%Lidocaine 10 ml                     | 0.9% saline solution 10 ml       | Continuous TEA at midthoracic level with bupivacaine and fentanyl         | Ketorolac 10 mg IV for severe ISP                         | Upper arm flex < 90 degree to avoid excessive distraction of shoulder joint | 6 h              |
| 2  | Danelli et al. 2007               | PNB vs PLA   | 0.2% Ropivacaine 10 ml                | NSS 10 ml                        | Continuous TEA at T5-T6 or T6-T7 with ropivacaine                         | Paracetamol infusion 1 g every 8 h, subcutaneous morphine | Upper arm flex < 90 degree to avoid excessive distraction of shoulder joint | 48 h             |
| 3  | Martinez Barenys et al. (2011)    | PNB VS SNB   | 2% Lidocaine 10 ml                    | 0.5% Bupivacaine 10 ml           | Continuous TEA at T5-T6 or T6-T7 interspace with bupivacaine and fentanyl | Dexketoprofen 50 mg IV every 8 h and metamizol 2 g IV     | Upper arm flex < 90 degree to avoid excessive distraction of shoulder joint | 72 h             |
| 4  | Ozyuvaci et al. (2013)            | SNB VS NO    | 0.5% levobupivacaine 10 ml            | NO                               | Continuous TEA at T6-T7 interspace with Levobupivacaine and fentanyl      | ND                                                        | ND                                                                          | 72 h             |
| 5  | Blichfeldt-Eckhardt et al. (2016) | PNB VS PLA   | 1% Ropivacaine 10 ml and              | NSS 10 ml and then 10 ml every 8 | Continuous TEA at T6-T7 with                                              | Paracetamol 1 g IV every 8 h, morphine IV,                | ND                                                                          | 60 h             |

|   |                                      |                      |                                                                                                |                                                                         |                                                                                                                                                         |                                                                                                            |                                                                          |      |
|---|--------------------------------------|----------------------|------------------------------------------------------------------------------------------------|-------------------------------------------------------------------------|---------------------------------------------------------------------------------------------------------------------------------------------------------|------------------------------------------------------------------------------------------------------------|--------------------------------------------------------------------------|------|
|   |                                      |                      | then 10 ml<br>every 8 h<br>until<br>intercostal<br>drain<br>removal or<br>maximal of 3<br>days | hrs until<br>intercostal<br>drain<br>removal or<br>maximal of<br>3 days | bupivacaine +<br>fentanyl                                                                                                                               | Ibuprofen or<br>lornoxicam<br>(Ibuprofen or<br>lornoxicam was<br>the first choice<br>for treatment<br>ISP) |                                                                          |      |
| 6 | Elfokery<br>et al.<br>(2018)         | PNB VS SNB<br>VS PLA | PNB: 0.5%<br>Bupivacaine<br>10 ml<br><br>SNB: 0.5%<br>Bupivacaine<br>10 ml                     | NO                                                                      | Continuous<br>TEA at T6-7<br>interspace with<br>bupivacaine<br>and fentanyl                                                                             | Ketorolac 30<br>mg IV over 50<br>ml saline for<br>ISP and not<br>exceed 120<br>mg/day                      | ND                                                                       | 48 h |
| 7 | Krishnam-<br>oorthy et<br>al. (2018) | PNB VS NO            | PNB: 0.25%<br>Bupivacaine<br>10 ml                                                             | NO                                                                      | TPVB with<br>bupivacaine at<br>T5 and T8<br>levels with<br>bupivacaine<br>and epipleural<br>catheter with<br>continuous<br>infusion with<br>bupivacaine | PCA Morphine                                                                                               | ND                                                                       | 72 h |
| 8 | Kuroiwa<br>et al.<br>(2020)          | PNB VS PLA           | 0.375%<br>Ropivacaine<br>10 ml                                                                 | 0.9% saline<br>solution 10<br>ml                                        | Continuous<br>TEA at T5-T6<br>or T6-T7<br>interspace with<br>ropivacaine<br>and fentanyl or<br>morphine                                                 | Acetaminophen<br>1 gm IV                                                                                   | Upper arm<br>was on an<br>arm rest,<br>fixed in a<br>natural<br>position | 24 h |

Abbreviations: NSS, normal saline; hrs, hours; TEA, thoracic epidural analgesia; TPVB, thoracic paravertebral nerve block; PNB, Phrenic nerve block; SNB, Suprascapular nerve block; PLA, placebo

**Table S3.** Description of outcome measures of enrolled studies in network analysis

| Study                                  | Outcomes                                                                                                                                                                                                                                                                             |
|----------------------------------------|--------------------------------------------------------------------------------------------------------------------------------------------------------------------------------------------------------------------------------------------------------------------------------------|
| <b>Incidence of ISP</b>                |                                                                                                                                                                                                                                                                                      |
| Scawn et al. (2001)                    | Ipsilateral shoulder pain (ISP) was assessed during 0.5, 1, 2, 3, 4, 5 and 6 h after surgery. Patients were also asked to localize the pain area of the pain to differentiate shoulder pain from wound pain.                                                                         |
| Danelli et al. (2007)                  | Presence of ISP at 6, 12, 24, 36 and 48 h after the end of surgery                                                                                                                                                                                                                   |
| Martinez Barenys et al. (2011)         | ISP was assessed at 0.5, 1, 2, 3, 4, 5, 6, 12, 48 and 72 h after the operation and at discharge.                                                                                                                                                                                     |
| Blichfeldt-Eckhardt et al. (2016)      | ISP was defined as any pain in the shoulder during the first six hour after the surgery                                                                                                                                                                                              |
| Elfokery et al. (2018)                 | ISP was assessed every 6 h for 48 h after the surgery.                                                                                                                                                                                                                               |
| Krishnamoorthy et al. (2018)           | Preoperative pain score at shoulder was assessed. ISP was evaluated at 1, 3, 6, 12, 24, 48, and 72 h after the surgical procedure during at rest and movement.                                                                                                                       |
| Kuroiwa et al. (2020)                  | The incidence of ISP was defined as the proportion of patients who reported a numeric rating scale (NRS) score more than 1 or equal at least once during 24 h after the operation.                                                                                                   |
| <b>Severity of ISP</b>                 |                                                                                                                                                                                                                                                                                      |
| Scawn et al. (2001)                    | Degree of ISP was evaluated using a visual analogue scale (VAS) (0 mm = no pain and 100 mm = worst pain imaginable) and a 5-point verbal ranking score (VRS) (0- no pain, 1-mild pain, 2-moderate pain, 3-severe pain, 4-horrible pain) at 0.5, 1, 2, 3, 4, 5 and 6 h after surgery. |
| Danelli et al. (2007)                  | The degree of ISP was assessed using a 100 mm VAS at 6, 12, 24, 36 and 48 h after the operation.                                                                                                                                                                                     |
| Martinez Barenys et al. (2011)         | A-10 cm VAS (0 = no pain and 10 the worst imaginable pain score and a 5-point OVRs (no pain, slight pain, moderate pain, intense pain and intolerable) were used to measure shoulder pain severity at 0.5, 1, 2, 3, 4, 5, 6, 12, 48 and 72 h after the operation and at discharge.   |
| Ozyuvaci et al. (2013)                 | The degree of ISP severity was measured using A-10 cm VAS before discharge from recovery room, during 1, 3, 6, 12, 24, 36, 48, and 72 h at rest and on coughing.                                                                                                                     |
| Blichfeldt-Eckhardt et al. (2016)      | Intensity of ISP during the first three days. An 11 point-NRS was used to measure severity of shoulder pain during 6, 20, 28, 36, 44, 52 and 60 h after surgery. The pain scores recorded were represented the maximum ISP during the preceding time period.                         |
| Elfokery et al. (2018)                 | VAS of shoulder pain was assessed every 6 h after surgical procedure for 48 h.                                                                                                                                                                                                       |
| Krishnamoorthy et al. (2018)           | Severity of ISP was measured using a 5-point verbal ranking scale (0 = no pain, 1 = mild, 2= moderate, 3 = severe, 4 = unbearable) during at rest and movement at 3, 6, 12, 24, 48, and 72 h after surgery.                                                                          |
| Kuroiwa et al. (2020)                  | The degree of ISP at rest was measured using an 11-point NRS during 2, 4, 8, 16, 24 h after the operation.                                                                                                                                                                           |
| <b>Respiratory function assessment</b> |                                                                                                                                                                                                                                                                                      |
| Scawn et al. (2001)                    | Baseline forced vital capacity (FVC) and forced expiratory volume in 1                                                                                                                                                                                                               |

|                                               |                                                                                                                                                                                                                                                                                                                                                                                            |
|-----------------------------------------------|--------------------------------------------------------------------------------------------------------------------------------------------------------------------------------------------------------------------------------------------------------------------------------------------------------------------------------------------------------------------------------------------|
|                                               | second (FEV1) were measured during preoperative period only                                                                                                                                                                                                                                                                                                                                |
| Danelli et al. (2007)                         | Preoperative ratio of FEV1/ FVC (%) were measured during preoperative period only.                                                                                                                                                                                                                                                                                                         |
| Elfokery et al. (2018)                        | Peak expiratory flow rate (PEFR) was recorded at baseline and every 6 h postoperatively for 48 h when VAS was less than 3 or equal.                                                                                                                                                                                                                                                        |
| Blichfeldt-Eckhardt et al. (2016)             | FEV1 and FVC at preoperative period and 2 h after operation were measured. The mean difference of FEV1 and FVC between preoperative and postoperative was presented.                                                                                                                                                                                                                       |
| Krishnamoorthy et al. (2018)                  | The peak flow measurement was obtained by using portable spirometer during preoperative period and postoperative period at 1 h, 3 h, 6 h, 12 h, 24 h, 48 h and 72 h.                                                                                                                                                                                                                       |
| <b>Ventilatory status by PaCO<sub>2</sub></b> |                                                                                                                                                                                                                                                                                                                                                                                            |
| Scawn et al. (2001)                           | Blood gas analysis was measured during each assessment. Arterial carbon dioxide partial pressure (PaCO <sub>2</sub> ) during 0.5, 1, 2, 3, 4, 5 and 6 h after surgery were shown.                                                                                                                                                                                                          |
| Danelli et al. (2007)                         | Blood gas analysis was measured during preoperative period, 24 and 48 h after extubation. PaCO <sub>2</sub> and PaO <sub>2</sub> / FiO <sub>2</sub> ratio at baseline, the first and second postoperative days were presented.                                                                                                                                                             |
| Elfokery et al. (2018)                        | Arterial blood gas was assessed at baseline and every 6 h during postoperative period for 48 h. Partial pressure of arterial oxygen (PaO <sub>2</sub> ), PaCO <sub>2</sub> , and arterial oxygen saturation were recorded.                                                                                                                                                                 |
| Blichfeldt-Eckhardt et al. (2016)             | Arterial blood gas was measured at 2 h after surgery. Partial pressure of arterial oxygen (PaO <sub>2</sub> ), PaCO <sub>2</sub> , arterial pH was recorded.                                                                                                                                                                                                                               |
| <b>Upper Motor extremity weakness</b>         |                                                                                                                                                                                                                                                                                                                                                                                            |
| Blichfeldt-Eckhardt et al. (2016)             | The American Shoulder and Elbow Surgeons standardised shoulder strength assessment form was used to test motor blockade. Forward flexion, abduction, internal and external rotation were assessed by using a 6-point scale (0 = no contraction and 5 = normal power). Scores of 0-1 were defined as paralysis, 2-3 as severe paresis and 4 as mild paresis. The lowest score was recorded. |
| Kuroiwa et al. (2020)                         | Range of shoulder movement was assessed at baseline and postoperative period after removal of chest drain.                                                                                                                                                                                                                                                                                 |

**Table S4.** Assessment of global inconsistency in networks using the ‘design-by-treatment’ interaction model

| Network outcome  | Chi-square | <i>p</i> -Value for test of global inconsistency |
|------------------|------------|--------------------------------------------------|
| Incidence of ISP | 3.30       | 0.192                                            |
| Severity of ISP  | 42.65      | < 0.001                                          |

Abbreviations: ISP, ipsilateral shoulder pain

**Table S5.** Assessment of loop inconsistency in networks

| Closed triangular of quadratic loop of evidence                                                         | Inconsistency factor<br>(95% CI) | <i>p</i> -Value | Loop<br>heterogeneity<br>$\tau^2$ |
|---------------------------------------------------------------------------------------------------------|----------------------------------|-----------------|-----------------------------------|
| <b>Incidence of ISP</b>                                                                                 |                                  |                 |                                   |
| PLACEBO- PNB-SNB                                                                                        | 0.33 (0.00, 1.03)                | 0.345           | 0.015                             |
| <b>Severity of ISP</b>                                                                                  |                                  |                 |                                   |
| PLACEBO-PNB-SNB                                                                                         | 3.97 (1.10, 6.84)                | 0.007           | 1.579                             |
| Abbreviations: ISP, ipsilateral shoulder pain; PNB, phrenic nerve block; SNB, suprascapular nerve block |                                  |                 |                                   |

**Table S6.** Results of pairwise meta-analyses

| Comparisons                                                           |     |         | No of studies | Pairwise meta-analysis RR<br>(95% CI) | Heterogeneity I <sup>2</sup> |
|-----------------------------------------------------------------------|-----|---------|---------------|---------------------------------------|------------------------------|
| <b>Prevention of ISP</b>                                              |     |         |               |                                       |                              |
| PNB                                                                   | vs. | PLACEBO | 5             | 0.48 (0.37 to 0.64)                   | 0.0 %                        |
| SNB                                                                   | vs. | PLACEBO | 1             | 0.38 (0.27 to 0.54)                   | 82.1%                        |
| PNB                                                                   | vs. | SNB     | 2             | 0.35 (0.18 to 0.68)                   | 52.3%                        |
| <b>Reduction severity of ISP</b>                                      |     |         |               |                                       |                              |
| PNB                                                                   | vs. | PLACEBO | 6             | -1.79 (-3.16 to -0.41)                | 88.2%                        |
| SNB                                                                   | vs  | PLACEBO | 1             | -1.00 (-2.11 to 0.11)                 | NA                           |
| PNB                                                                   | vs. | SNB     | 2             | -2.75 (-5.26 to -0.24)                | 97.0%                        |
| <b>Postoperative ventilatory status indicated by PaCO<sub>2</sub></b> |     |         |               |                                       |                              |
| PNB                                                                   | vs. | PLACEBO | 3             | 0.25 (-2.71 to 3.20)                  | 75.9%                        |

Abbreviations: ISP, ipsilateral shoulder pain; PNB; Phrenic nerve block, SNB; Suprascapular nerve block, RR, risk ratio

**Table S7.** Results of sensitivity and subgroup analysis of network meta-analysis for prevention of ISP

| Interventions                                       | Estimated effect of network meta-analysis; Risk ratio, RR (95% CI) |                                   |                                    |                                   |                                            |
|-----------------------------------------------------|--------------------------------------------------------------------|-----------------------------------|------------------------------------|-----------------------------------|--------------------------------------------|
|                                                     | Main analysis                                                      | Included ISP at 6 h after surgery | Included ISP at 24 h after surgery | Included studies with thoracotomy | Included only studies conducted since 2010 |
| PNB*                                                | <b>0.44 (0.34 to 0.58)</b>                                         | <b>0.38 (0.27-0.53)</b>           | <b>0.44 (0.29 to 0.68)</b>         | <b>0.37 (0.27 to 0.51)</b>        | <b>0.44 (0.29 to 0.65)</b>                 |
| SNB *                                               | 1.02 (0.71 to 1.46)                                                | 0.85 (0.56-1.28)                  | 1.05 (0.62 to 0.77)                | 0.96 (0.72 to 1.26)               | 1.04 (0.63 to 1.73)                        |
| PNB <sup>#</sup>                                    | <b>0.43 (0.29 to 0.64)</b>                                         | <b>0.45 (0.30-0.68)</b>           | <b>0.42 (0.24 to 0.72)</b>         | <b>0.39 (0.27 to 0.55)</b>        | <b>0.42 (0.25 to 0.70)</b>                 |
| Overall inconsistency Chi-square ( <i>p</i> -Value) | 0.192                                                              | 0.067                             | 0.218                              | 0.318                             | 0.293                                      |
| Numbers of studies                                  | 7                                                                  | 7                                 | 5                                  | 5                                 | 5                                          |

\* Results compared to placebo    # Results compared to SNB

Abbreviations: ISP, ipsilateral shoulder pain, PNB, phrenic nerve block; SNB, suprascapular nerve block

**Table S8.** Results of sensitivity and subgroup analysis of network meta-analysis for reduction of ISP severity

| Interventions                                       | Estimated effect of network meta-analysis; Weighted Mean difference, MD (95% CI) |                                       |                                        |                                        |                                            |                                    |
|-----------------------------------------------------|----------------------------------------------------------------------------------|---------------------------------------|----------------------------------------|----------------------------------------|--------------------------------------------|------------------------------------|
|                                                     | Main analysis                                                                    | Included ISP at 6 hours after surgery | Included ISP at 24 hours after surgery | Included only studies with thoracotomy | Included only studies conducted since 2010 | Included only high-quality studies |
| PNB*                                                | <b>-1.75</b><br>(-3.47 to -0.04)                                                 | <b>-2.02</b><br>(-3.21, -0.84)        | <b>-2.27</b><br>(-4.05 to -0.48)       | -2.22<br>(-4.70 to 0.27)               | <b>-2.27</b><br>(-4.05 to -0.48)           | -1.47<br>(-3.17 to 0.22)           |
| SNB *                                               | - 0.61<br>(-2.95 to 1.72)                                                        | - 0.54<br>(-2.10, 1.01)               | -0.87<br>(-3.10 to 1.36)               | -0.85<br>(-3.65 to 1.95)               | -0.87<br>(-3.10 to 1.36)                   | 0.44<br>(-2.31 to 3.18)            |
| PNB <sup>#</sup>                                    | -1.14<br>(-3.47, to 1.19)                                                        | -1.48<br>(-3.05,0.08)                 | -1.40<br>(-3.63 to 0.83)               | -1.37<br>(-4.17 to 1.44)               | -1.40<br>(-3.63 to 0.83)                   | -1.91<br>(-4.42 to 0.60)           |
| Overall inconsistency Chi-square ( <i>p</i> -Value) | < 0.001                                                                          | 0.575                                 | < 0.001                                | < 0.001                                | < 0.001                                    | < 0.001                            |
| Numbers of studies                                  | 7                                                                                | 7                                     | 6                                      | 5                                      | 6                                          | 6                                  |

\*Results compared to placebo # Results compared to SNB

Abbreviations: ISP, ipsilateral shoulder pain, PNB, phrenic nerve block; SNB, suprascapular nerve block

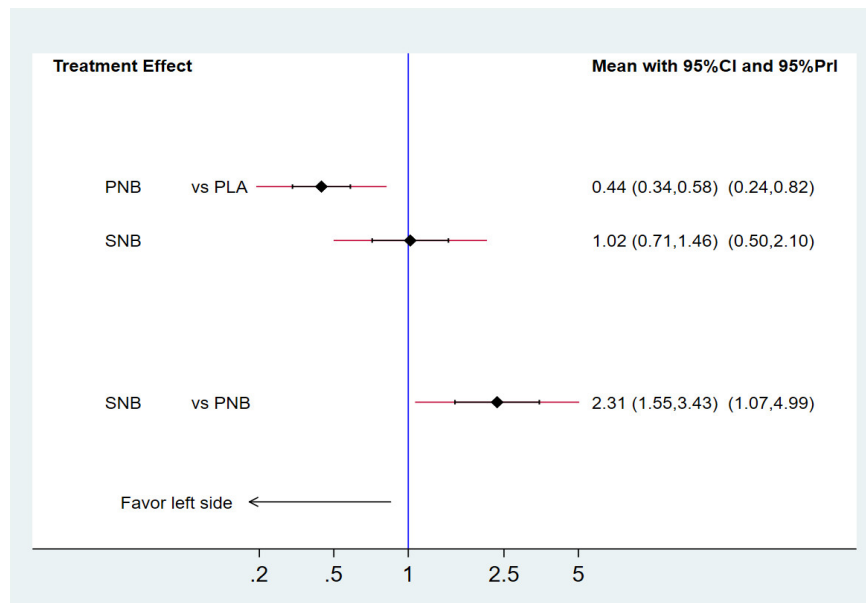

**Figure S1.** Predictive interval plot of anesthetic interventions network for the incidence of ISP during 24 h after thoracic surgery. The solid black lines represent the confidence intervals for summary risk ratio or mean difference for each comparison and the red lines the respective predictive intervals. The solid blue line corresponds to the line of no difference (RR = 1 or mean difference = 0). The arrow with “favor right or left” if the confidence interval is significant in the same direction of arrow. The anesthetic intervention in the designated direction (right/ left) is more favorable than the intervention in the other direction.

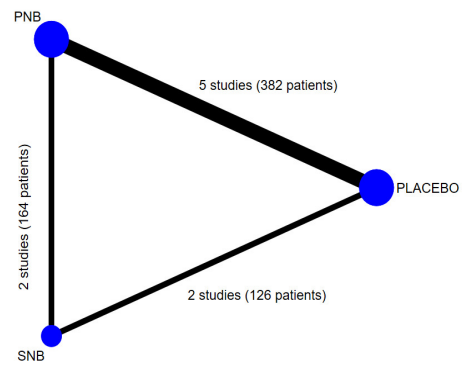

**Figure S2.** The network map of included studies for the severity of ISP. Width of the lines was the number of trials comparing pairwise intervention. Size of the circle was the proportion of sample size

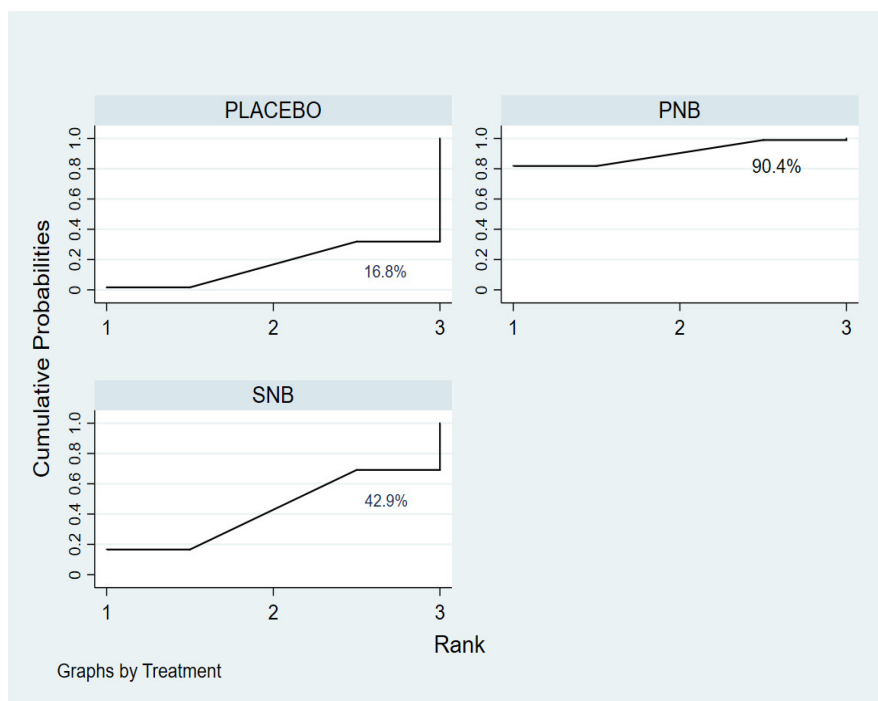

**Figure S3.** SUCRA ranking curves for reduction of ISP severity during the first 24 h after surgery

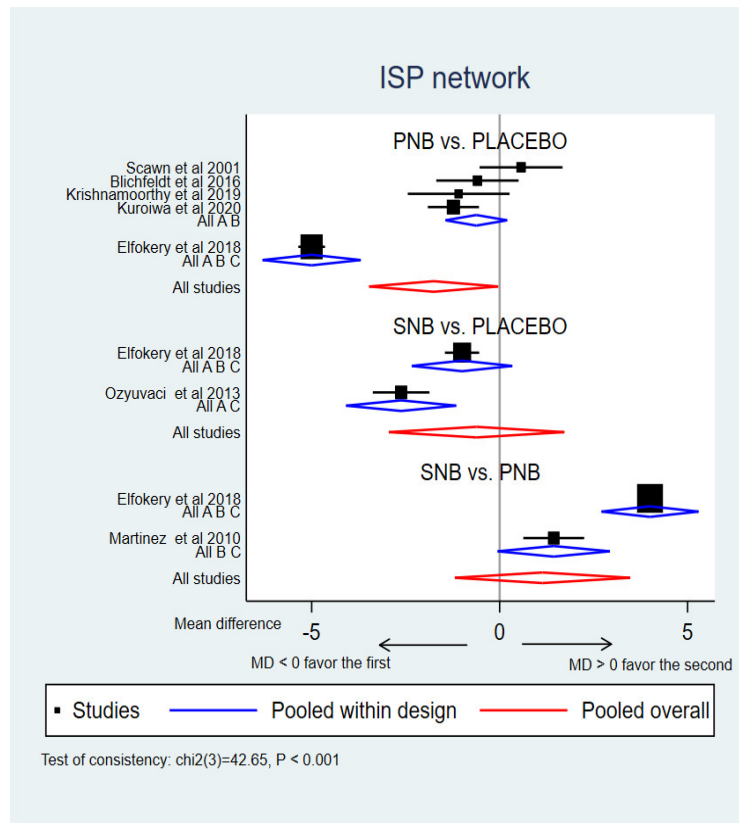

**Figure S4.** Network forest plot for reduction of ISP severity of each study during 24 h after surgery. The effect of PNB on ISP severity was comparable to SNB and placebo and the effect on SNB was also comparable to placebo. Forest plot: mean difference < 0 indicated that the first treatment was favored compared to the second. Mean difference > 0 indicated that the second treatment was favored compared to the first

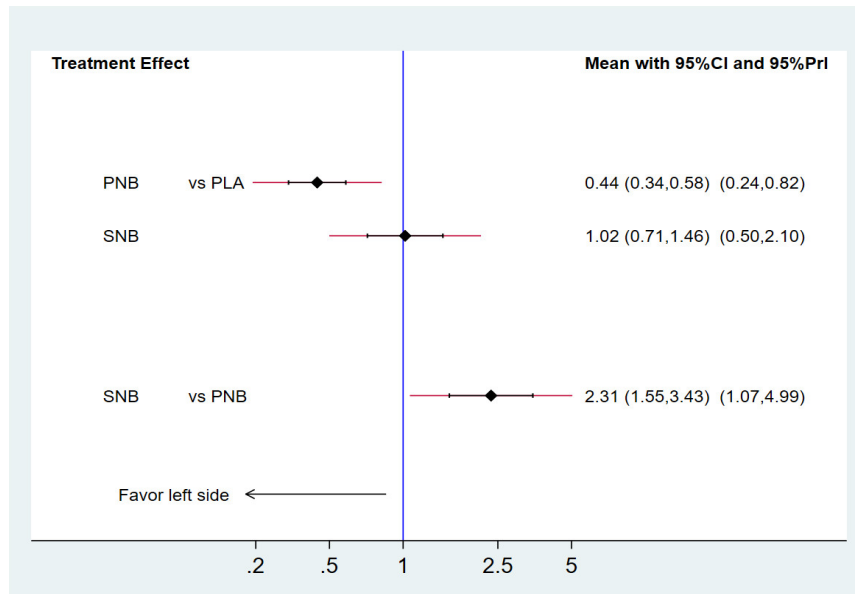

**Figure S5.** Predictive interval plot of anesthetic interventions network for severity of ISP during 24 hours after thoracic surgery. The solid black lines represent the confidence intervals for mean difference for each comparison and the red lines the respective predictive intervals. The solid blue line corresponds to the line of no difference (mean difference = 0). The arrow with “favor right or left” if the confidence interval is significant in the same direction of arrow. The anesthetic intervention in the designated direction (right/ left) is more favorable that the intervention in the other direction.

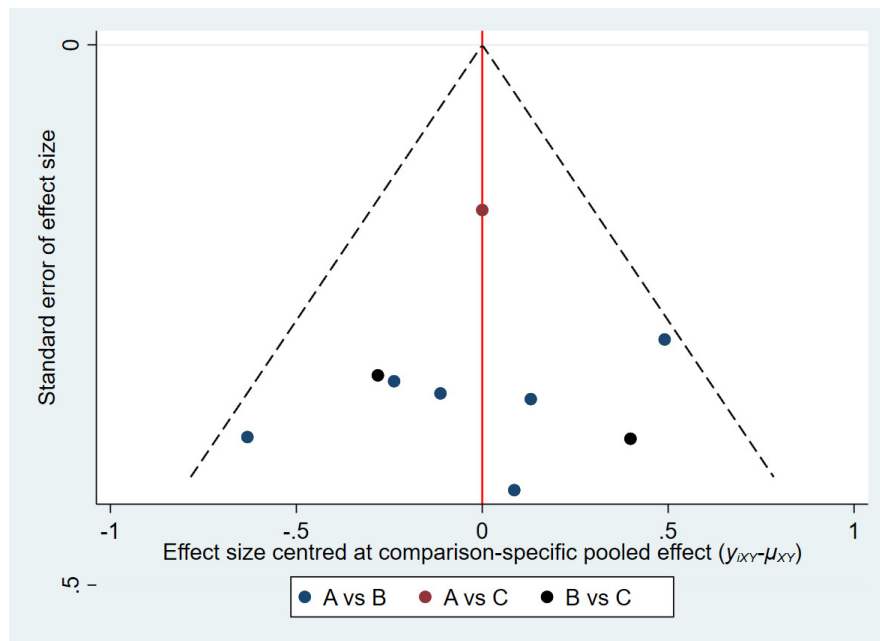

**Figure S6.** Comparison-adjusted funnel plot for the network of the prevention of ISP in all comparisons. A = PLACEBO, B = Phrenic nerve block, C = Suprascapular nerve block

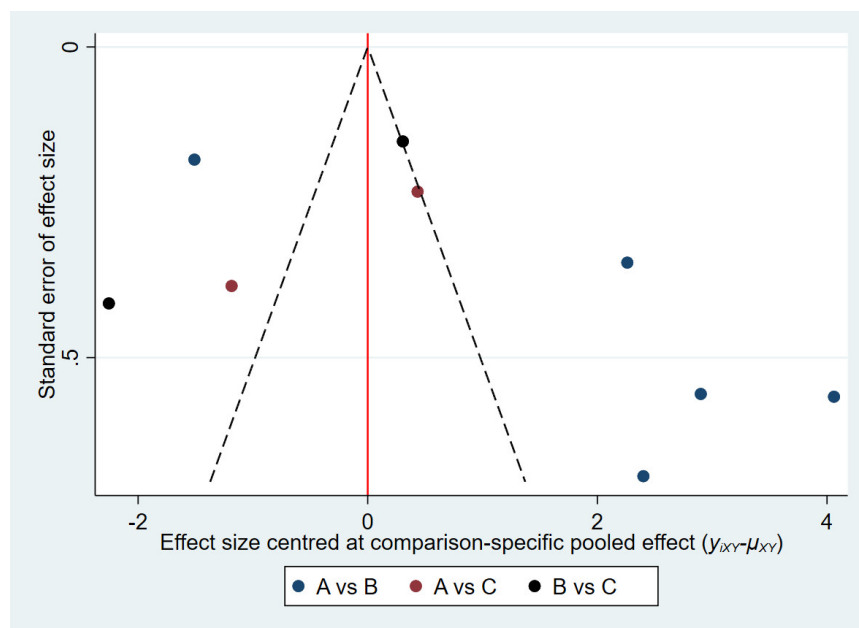

**Figure S7.** Comparison-adjusted funnel plot for the network of the reduction of ISP severity in all comparisons. A = PLACEBO, B = Phrenic nerve block, C = Suprascapular nerve block
